# Supplementary material for: Gene repression via multiplex gRNA strategy in Y. lipolytica
Source: PubMed Central journal article supplement (PMC5910576; doi:10.1186/s12934-018-0909-8), 2018-04-20

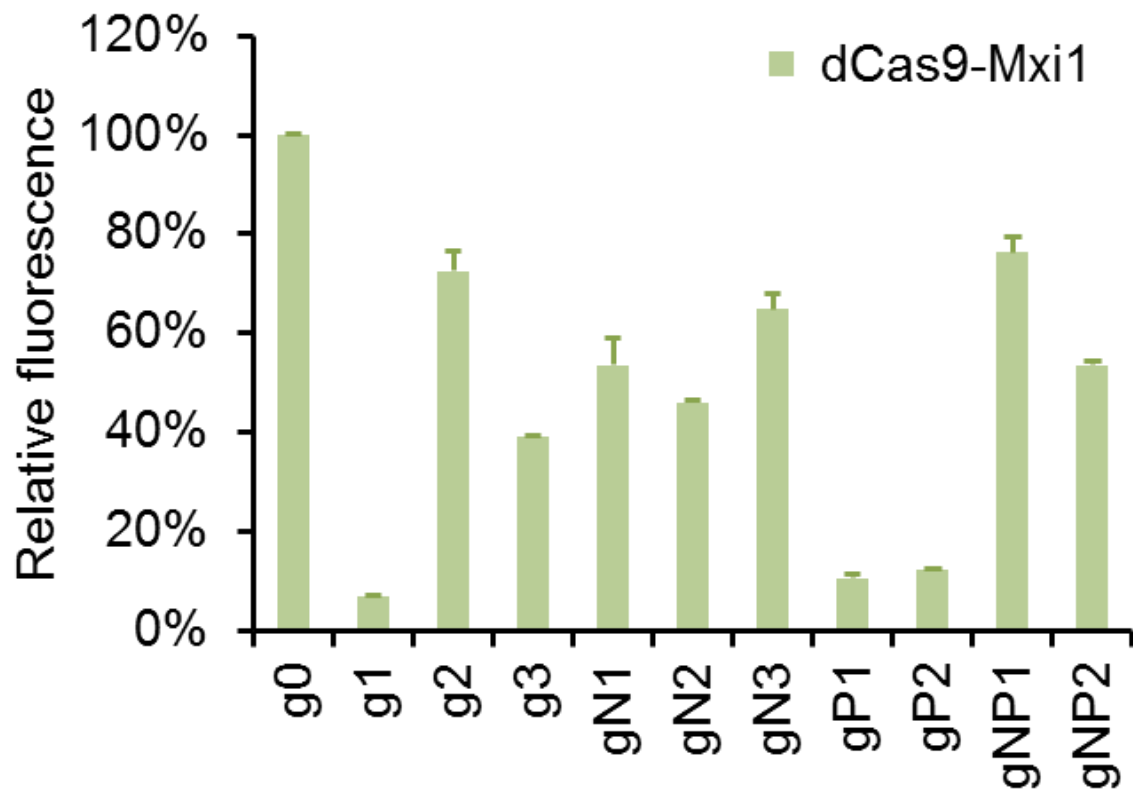

Supplement: 12934_2018_909_MOESM8_ESM.pdf [file 12934_2018_909_MOESM8_ESM.pdf]
